# Supplementary material for: Concurrent Validity and Reliability of an Inertial Measurement Unit for the Assessment of Craniocervical Range of Motion in Subjects with Cerebral Palsy
Source: PubMed Central journal article supplement (PMC7168926; doi:10.3390/diagnostics10020080), 2020-02-01
Supplement: diagnostics-10-00080-s001.pdf [file diagnostics-10-00080-s001.pdf]

**Table S1.** Two-way ANOVA results for the spatial planes ROM by evaluation and group (CP: n=23; CG: n=23) factors\*.

| Spatial plane     | Factor                                                  |                      |                                                                                   | Pair-wise comparison                                                                                        |                                  |         |
|-------------------|---------------------------------------------------------|----------------------|-----------------------------------------------------------------------------------|-------------------------------------------------------------------------------------------------------------|----------------------------------|---------|
|                   |                                                         | Mean (95%CI)         | p-value                                                                           |                                                                                                             | Difference between means (95%CI) | P-value |
|                   | <b>Evaluation</b>                                       |                      |                                                                                   |                                                                                                             |                                  |         |
| Flexion-extension | <i>CROM</i>                                             | 131.7 (124.8; 138.6) | <0.001                                                                            | <i>CROM vs IMU 1<sup>st</sup> assessment 1<sup>st</sup> day</i>                                             | -4.1 (-6.2; -2.1)                | <0.001  |
|                   | <i>IMU 1<sup>st</sup> assessment 1<sup>st</sup> day</i> | 135.8 (128.5; 143.1) |                                                                                   | <i>CROM vs IMU 2<sup>nd</sup> assessment 1<sup>st</sup> day</i>                                             | -5.8 (-11.8; -0.2)               | 0.049   |
|                   | <i>IMU 2<sup>nd</sup> assessment 1<sup>st</sup> day</i> | 137.4 (129.8; 145.2) |                                                                                   | <i>CROM vs IMU 2<sup>nd</sup> day</i>                                                                       | -9.5 (-17.7; -1.3)               | 0.015   |
|                   | <i>IMU 2<sup>nd</sup> day</i>                           | 141.2 (132.8; 149.6) |                                                                                   | <i>IMU 1<sup>st</sup> assessment 1<sup>st</sup> day vs IMU 2<sup>nd</sup> assessment 1<sup>st</sup> day</i> | -1.6 (-8.0; 4.7)                 | 0.989   |
|                   |                                                         |                      |                                                                                   | <i>IMU 1<sup>st</sup> assessment 1<sup>st</sup> day vs IMU 2<sup>nd</sup> day</i>                           | -5.4 (-13.2; 2.3)                | 0.160   |
|                   |                                                         |                      | <i>IMU 2<sup>nd</sup> assessment 1<sup>st</sup> day vs IMU 2<sup>nd</sup> day</i> | -3.8 (-10.9; 3.4)                                                                                           | 0.920                            |         |
|                   | <b>Group</b>                                            |                      |                                                                                   |                                                                                                             |                                  |         |
|                   | <i>CP</i>                                               | 135.5 (125.6; 145.3) | 0.757                                                                             |                                                                                                             |                                  |         |
| <i>CG</i>         | 137.6 (127.6; 147.7)                                    |                      |                                                                                   | 2.2 (-11.9; 16.2)                                                                                           |                                  |         |
|                   | <b>Evaluation</b>                                       |                      |                                                                                   |                                                                                                             |                                  |         |
| Rotational        | <i>CROM</i>                                             | 145.7 (141.1; 150.3) | 0.020                                                                             | <i>CROM vs IMU 1<sup>st</sup> assessment 1<sup>st</sup> day</i>                                             | -4.5 (-10.4; 1.3)                | 0.218   |
|                   | <i>IMU 1<sup>st</sup> assessment 1<sup>st</sup> day</i> | 150.3 (144.5; 156.0) |                                                                                   | <i>CROM vs IMU 2<sup>nd</sup> assessment 1<sup>st</sup> day</i>                                             | -3.7 (-10.3; 2.9)                | 0.757   |
|                   | <i>IMU 2<sup>nd</sup> assessment 1<sup>st</sup> day</i> | 149.4 (143.4; 155.4) |                                                                                   | <i>CROM vs IMU 2<sup>nd</sup> day</i>                                                                       | -8.9 (-17.5; -0.4)               | 0.036   |
|                   | <i>IMU 2<sup>nd</sup> day</i>                           | 154.7 (148.9; 160.4) |                                                                                   | <i>IMU 1<sup>st</sup> assessment 1<sup>st</sup> day vs IMU 2<sup>nd</sup> assessment 1<sup>st</sup> day</i> | 0.8 (-5.0; 6.7)                  | 0.990   |
|                   |                                                         |                      |                                                                                   | <i>IMU 1<sup>st</sup> assessment 1<sup>st</sup> day vs IMU 2<sup>nd</sup> day</i>                           | -4.4 (-13.7; 4.9)                | 0.980   |
|                   |                                                         |                      | <i>IMU 2<sup>nd</sup> assessment 1<sup>st</sup> day vs IMU 2<sup>nd</sup> day</i> | -5.2 (-13.1; 2.6)                                                                                           | 0.436                            |         |
|                   | <b>Group</b>                                            |                      |                                                                                   |                                                                                                             |                                  |         |
|                   | <i>CP</i>                                               | 151.5 (145.3; 157.9) | 0.482                                                                             |                                                                                                             |                                  |         |
| <i>CG</i>         | 148.5 (142.2; 154.7)                                    |                      |                                                                                   | -3.1 (5.8; -12.0)                                                                                           |                                  |         |
|                   | <b>Evaluation</b>                                       |                      |                                                                                   |                                                                                                             |                                  |         |
| Side-bending      | <i>CROM</i>                                             | 95.7 (89.8; 102.0)   | 0.001                                                                             | <i>CROM vs IMU 1<sup>st</sup> assessment 1<sup>st</sup> day</i>                                             | 4.5 (1.1; 8.0)                   | 0.004   |
|                   | <i>IMU 1<sup>st</sup> assessment 1<sup>st</sup> day</i> | 91.1 (84.4; 97.5)    |                                                                                   | <i>CROM vs IMU 2<sup>nd</sup> assessment 1<sup>st</sup> day</i>                                             | 5.7 (1.2; 12.2)                  | 0.019   |
|                   | <i>IMU 2<sup>nd</sup> assessment 1<sup>st</sup> day</i> | 89.9 (82.8; 94.8)    |                                                                                   | <i>CROM vs IMU 2<sup>nd</sup> day</i>                                                                       | 2.4 (0.0; 4.9)                   | 0.048   |
|                   | <i>IMU 2<sup>nd</sup> day</i>                           | 93.5 (87.3; 97.5)    |                                                                                   | <i>IMU 1<sup>st</sup> assessment 1<sup>st</sup> day vs IMU 2<sup>nd</sup> assessment 1<sup>st</sup> day</i> | 1.2 (-2.4; 6.8)                  | 0.987   |
|                   |                                                         |                      |                                                                                   | <i>IMU 1<sup>st</sup> assessment 1<sup>st</sup> day vs IMU 2<sup>nd</sup> day</i>                           | -2.5 (-8.9; 3.4)                 | 0.377   |
|                   |                                                         |                      | <i>IMU 2<sup>nd</sup> assessment 1<sup>st</sup> day vs IMU 2<sup>nd</sup> day</i> | -3.4 (-8.7; 0.1)                                                                                            | 0.061                            |         |
|                   | <b>Group</b>                                            |                      |                                                                                   |                                                                                                             |                                  |         |
|                   | <i>CP</i>                                               | 93,3 (85,1; 101,4)   | 0.725                                                                             |                                                                                                             |                                  |         |
| <i>CG</i>         | 91.3 (83.1; 99.4)                                       |                      |                                                                                   | -2.0 (-13.6; 9.5)                                                                                           |                                  |         |

\* ANOVA evaluation-by-group interaction was not statistically significant (p>0.05).

Abbreviations: CROM, Cervical range of motion device; IMU 1<sup>st</sup> assessment 1<sup>st</sup> day, Inertial Measurement Unit first assessment on the first day; IMU 2<sup>nd</sup> assessment 1<sup>st</sup> day, Inertial Measurement Unit second assessment on the first day; IMU 2<sup>nd</sup> day, Inertial Measurement Unit assessment on the second day; CG, Control group; CP, Cerebral palsy group.

Values in parenthesis indicate the 95% confidence interval.

Data are expressed in degrees.
